# Supplementary material for: PBDEs and PCBs in the liver of the St Lawrence Estuary beluga (Delphinapterus leucas): a comparison of levels and temporal trends with the blubber
Source: Royal Society of Chemistry journal article supplement (doi:10.1039/c0em00310g), 2011-01-01
Supplement: c0em00310g.pdf [file c0em00310g.pdf]

1 ELECTRONIC SUPPLEMENTARY INFORMATION FOR EM-ART-06-2010-  
2 000310.R1

3 PBDEs AND PCBs IN THE LIVER OF THE ST. LAWRENCE ESTUARY BELUGA  
4 (*DELPHINAPTERUS LEUCAS*): A COMPARISON OF LEVELS AND TEMPORAL  
5 TRENDS WITH THE BLUBBER

6

7 Meriem Raach<sup>\*1,2</sup>, Michel Lebeuf<sup>2</sup>, Émilien Pelletier<sup>1</sup>

8

9

10

11

12 1) *Institut des Sciences de la Mer de Rimouski, Université du Québec à Rimouski, 310 allée des*  
13 *Ursulines, C.P. 3300, Rimouski (Québec), Canada G5L 3A1*

14

15 2) *Department of Fisheries and Oceans, Maurice Lamontagne Institute, P.O. Box 1000, Mont-*  
16 *Joli, Québec, Canada G5H 3Z4*

17

18 *\*Corresponding author phone: (+1418) 775-0690; Fax. (+1418) 775-0718*

19 *E-mail: meriem.raach@uqar.qc.ca*

20

21

22

23

24

25

26

## 1 **Samples**

2           Since 1982, a carcass monitoring program has been carried out in order to assess  
3 causes of mortality of the beluga whale from the SLE [1, 2]. Beached carcasses were  
4 examined and, if in a reasonably good state of preservation, were transported to the  
5 faculty of veterinary medicine at Ste-Hyacinthe (QC), where a complete necropsy was  
6 performed. Carcasses that were not transported were documented, biological parameters  
7 were determined and teeth were removed for age determination. Blubber was sampled  
8 and whenever possible, liver, brain, muscle, kidney, blood and other tissues were sampled  
9 in order to evaluate and assess trends and dynamic of POPs [1- 6].

10           Carcass state was coded according to Geraci and Lounsbury classification [7]. For  
11 example, code of 1 refers to a good carcass condition while code of 4 means that the  
12 carcass is in fair condition. In such a case, a necropsy is not required, and only the  
13 blubber and a few teeth are removed for age determination. Biological parameters  
14 including total length and sex were recorded for each whale. Total length was measured  
15 from the rostrum to the notch of tail fluke. The age estimation is based on counting the  
16 number of growth layer groups (GLGs) on longitudinal sectioned teeth and considering  
17 the deposition of one GLG yearly [8].

18

19

20

1 **Table 1** Data of individual belugas stranded between 1993 and 2007 on the SLE shores

| Sample ID   | Stranding date | Stranding location    | Gender | Length (m) | Age (GLG) | Carcass Code | Lipid (%) | Water (%)        | Total protein (%) |
|-------------|----------------|-----------------------|--------|------------|-----------|--------------|-----------|------------------|-------------------|
| DL-02-93    | May-93         | Ruisseau castor       | M      | 3.97       | 50        | 3.0          | 3.3       | 74.8             | 17.6              |
| DL-01-94    | May-94         | Tadoussac             | M      | 4.56       | 55        | 2.5          | 1.4       | 73.7             | 23.2              |
| DL-11-95    | October-95     | Les Escoumins         | M      | 4.19       | 52        | 2.5          | 3.4       | 67.7             | 24.1              |
| DL-12-95    | October-95     | Grandes-Bergeronnes   | M      | 4.00       | 22        | 3.5          | 1.7       | n.d <sup>a</sup> | n.d               |
| DL-01-96    | May-96         | Les Escoumins         | M      | 4.27       | 42        | 2.5          | 1.3       | n.d              | n.d               |
| DL-02-98    | May-98         | Ste. Flavie           | M      | 4.01       | 24        | 3.0          | 1.1       | 74.4             | 22.7              |
| DL-07-98    | August-98      | Petit Matane          | M      | 4.06       | 35        | 2.0          | 3.2       | 71.5             | 22.4              |
| DL-08-98    | September-98   | Port Cartier          | M      | 3.96       | 44        | 3.5          | 3.9       | 73.3             | 20.7              |
| DL-09-98    | December-98    | Ste. Flavie           | M      | 4.06       | 36        | 3.0          | 1.9       | 75.3             | 22.9              |
| DL-01-99    | April-99       | Ste. Flavie           | M      | 4.02       | 31        | 3.0          | 2.9       | 67.0             | 21.3              |
| DL-02-99    | April-99       | Métis sur Mer         | M      | 4.16       | 35        | 3.5          | 2.4       | 74.6             | 20.3              |
| DL-04-99    | June-99        | Trois Pistoles        | M      | 3.98       | 34        | 2.5          | 2.9       | 72.0             | 21.4              |
| DL-03-00    | July-00        | Les Escoumins         | M      | 4.11       | 35        | 3.5          | 3.1       | 69.0             | 29                |
| DL-01-01    | April-01       | Pointe au père        | M      | 4.40       | 48        | 3.0          | 2.0       | 71.0             | 26.1              |
| DL-04-01    | July-01        | Ile au Caribou        | M      | 4.10       | 54        | 3.5          | 3.7       | 72.6             | 25.8              |
| DL-07-01    | November-01    | Baie des Ha! Ha!      | M      | 3.85       | 55        | 3.5          | 2.5       | 74.9             | 24.9              |
| DL-03-02    | June-02        | Matane                | M      | 4.33       | 30        | 3.0          | 2.5       | 72.0             | 29.0              |
| DL-08-02    | November-02    | Matane                | M      | 4.25       | 24        | 3.0          | 2.9       | 76.9             | 19.9              |
| DL-09-02    | November-02    | Baie des sables       | M      | 4.20       | 40        | 3.0          | 1.5       | 71.0             | 27.5              |
| DL-102-02   | May-02         | Rivière Ouelle        | M      | 4.20       | 74        | 4.0          | 5.6       | 66.1             | 28.4              |
| DL-01-2003  | May-03         | Ste. Flavie           | M      | 4.13       | 33        | 4.0          | 3.2       | 76.0             | 19.8              |
| DL-08-2003  | November-03    | Tadoussac             | M      | 3.74       | 33        | 3.0          | 2.7       | 69.5             | 29.9              |
| DL-10-2004  | December-04    | Rivière à Claude      | M      | 4.23       | 29        | 3.5          | 2.1       | 71.0             | 28.5              |
| DL-101-2004 | April-04       | Île Verte             | M      | 3.90       | 44        | 4.0          | 1.2       | 74.9             | 24.1              |
| DL-105-2004 | July-04        | Ste. Anne des Monts   | M      | 4.18       | 39        | 4.0          | 10.7      | 72.0             | 18.8              |
| DL-108-2004 | September-04   | Baie des mille vaches | M      | 4.51       | 30        | 4.0          | 1.6       | 76.8             | 20.1              |

Supplementary Material (ESI) for Journal of Environmental Monitoring  
This journal is © The Royal Society of Chemistry 2011

| Sample ID   | Stranding date | Stranding location            | Gender | Length (m) | Age (GLG) | Carcass Code | Lipid (%) | Water (%) | Total protein (%) |
|-------------|----------------|-------------------------------|--------|------------|-----------|--------------|-----------|-----------|-------------------|
| DL-01-2005  | May-05         | St. Ulric                     | M      | 4.20       | 39        | 3.0          | 3.5       | 70.0      | 24.5              |
| DL-05-2005  | September-05   | Les Escoumins                 | M      | 4.37       | 28        | 3.5          | 3.2       | 71.0      | 25.7              |
| DL-01-2006  | July-06        | Pointe au père                | M      | 4.36       | 47        | 3.0          | 2.9       | 72.6      | 22.8              |
| DL-101-2006 | March-06       | Cloridorme                    | M      | 4.57       | 43        | 4.0          | 14.9      | 59.9      | 21.0              |
| DL-09-2007  | September-07   | Forestville                   | M      | 4.05       | 33        | 2.5          | 2.5       | 70.3      | 25.8              |
| DL-10-2007  | November-07    | Baie des Sables               | M      | 3.92       | 21        | 2.0          | 1.9       | 74.4      | 21.5              |
| DL-107-2007 | October-07     | Les Méchins                   | M      | 4.17       | 37        | 4.0          | 2.2       | 69.7      | 26.3              |
| DL-08-1993  | October-93     | Les Méchins                   | F      | 3.55       | 25        | 2.5          | 0.9       | 71.0      | 26.2              |
| DL-04-1994  | September-94   | St. Joachim Tourelles         | F      | 3.39       | 20        | 3.0          | 2.0       | 72.6      | 18.4              |
| DL-05-1995  | June-95        | St. Ulric                     | F      | 3.70       | 52        | 3.0          | 1.3       | 70.7      | 26.6              |
| DL-02-1997  | May-97         | Iles aux lièvres              | F      | 3.38       | 57        | 2.0          | 2.7       | 71.7      | 22.4              |
| DL-03-1997  | June-97        | Rivière Ouelle                | F      | 3.63       | 42        | 2.0          | 1.0       | 70.4      | 22.4              |
| DL-105-1997 | September-97   | Bic                           | F      | 3.91       | 60        | 4.0          | 2.4       | 71.9      | 27.7              |
| DL-03-1998  | May-98         | Anse au persil                | F      | 3.77       | 53        | 2.5          | 1.6       | 71.0      | 24.4              |
| DL-04-1998  | May-98         | Ste. Flavie                   | F      | 3.56       | 41        | 2.5          | 3.1       | 71.9      | 22.8              |
| DL-06-1998  | July-98        | Bic                           | F      | 3.88       | 22        | 3.5          | 4.5       | 72.6      | 22.5              |
| DL-03-1999  | May-99         | Iles aux lièvres              | F      | 3.66       | 54        | 4.0          | 2.8       | 71.5      | n.d               |
| DL-05-1999  | July-99        | St. Ulric                     | F      | 3.57       | 22        | 2.5          | 3.1       | 72.0      | 21                |
| DL-07-1999  | August-99      | Trois Pistoles                | F      | 3.38       | 20        | 3.0          | 2.2       | 70.0      | 24.5              |
| DL-107-1999 | November-99    | Baie des Rochers              | F      | 3.64       | 30        | 4.0          | 0.7       | 78.0      | 17.6              |
| DL-05-2000  | October-00     | Bic                           | F      | 4.01       | 34        | 3.0          | 6.2       | 67.0      | 22.6              |
| DL-02-2001  | May-01         | Ste. Thérèse de cap Colombier | F      | 3.75       | 40        | 3.0          | 4.5       | 68.0      | 31.2              |
| DL-01-2002  | April-02       | St. Irénée                    | F      | 3.76       | 28        | 2.0          | 3.5       | 72.0      | 22                |
| DL-05-2002  | July-02        | Île Verte                     | F      | 3.71       | 40        | 2.0          | 1.7       | 73.0      | 24.4              |
| DL-02-2003  | June-03        | St. Ulric                     | F      | 3.56       | 46        | 2.0          | 6.9       | 69.4      | 20.7              |
| DL-06-2003  | October-03     | Longue Rive                   | F      | 3.83       | 45        | 2.5          | 26.0      | 55.0      | 16                |
| DL-07-2003  | October-03     | Rimouski                      | F      | 3.10       | 33        | 2.5          | 2.1       | 73.0      | 23.4              |

Supplementary Material (ESI) for Journal of Environmental Monitoring  
This journal is © The Royal Society of Chemistry 2011

| Sample ID   | Stranding date | Stranding location        | Gender | Length (m) | Age (GLG) | Carcass Code | Lipid (%) | Water (%) | Total protein (%) |
|-------------|----------------|---------------------------|--------|------------|-----------|--------------|-----------|-----------|-------------------|
| DL-101-2003 | May-03         | Baie des Rochers          | F      | 3.46       | 50        | 4.0          | 1.8       | 72.0      | 23                |
| DL-102-2003 | May-03         | New Richmond              | F      | 3.54       | 28        | 4.0          | 0.8       | 81.0      | 17                |
| DL-02-2004  | June-04        | Port au Persil            | F      | 3.47       | 45        | 2.5          | 3.2       | 73.0      | 22.3              |
| DL-03-2004  | June-04        | Rimouski                  | F      | 3.30       | 61        | 2.5          | 1.5       | 72.4      | 23                |
| DL-107-2004 | August-04      | Grosse roche              | F      | 3.88       | 39        | 4.0          | 19.2      | 65.3      | n.d               |
| DL-02-2005  | May-05         | Ste. Luce                 | F      | 3.77       | 33        | 3.5          | 3.9       | 69.0      | 24.8              |
| DL-03-2005  | August-05      | Pointe au père            | F      | 3.62       | 32        | 3.0          | 7.0       | 70.6      | n.d               |
| DL-06-2005  | September-05   | Baie des Ha! Ha! Saguenay | F      | 3.73       | 37        | 3.5          | 3.3       | 69.0      | 28.4              |
| DL-102-2006 | May-06         | Notre Dame du Portage     | F      | 3.45       | 21        | 4.0          | 1.6       | 79.4      | 17.5              |
| DL-103-2006 | July-06        | Rivière à Claude          | F      | 3.69       | 44        | 4.0          | 3.2       | 80.5      | 15                |
| DL-03-2007  | July-07        | Île Verte                 | F      | 3.74       | 40        | 3.0          | 1.2       | 72.7      | 24.4              |
| DL-04-2007  | July-07        | Anse Pleureuse            | F      | 3.80       | 25        | 3.5          | 6.1       | 73.2      | 22.7              |

Supplementary Material (ESI) for Journal of Environmental Monitoring  
This journal is © The Royal Society of Chemistry 2011

1<sup>a</sup>: not determined

2

3

4

## 1 **Liver characterization**

2 Water, lipid and protein contents were determined in beluga liver.

### 3 Water content

4 1.25g of liver wet weight was dried at 70°C over night. Water percentage was  
5 calculated using the following formula:

$$6 \text{ \% water} = [1 - (\text{dried weight sample} / \text{wet weight sample}) * 100].$$

### 7 Lipid content

8 This parameter was determined gravimetrically by measuring the total non volatile  
9 solvent (Dichloromethane/Hexanes 50/50 v/v) extractable material on subsamples taken  
10 from the original extracts.

$$11 \text{ \% lipid} = [(\text{lipid extract weight} * 100) / \text{liver wet weight}]$$

### 12 Protein content

13 The total protein was determined following the Kjeldahl method [9]. Briefly,  
14 proteinic nitrogen is converted into ammonia (NH<sub>3</sub>) at the time of hot digestion with  
15 sulphuric acid concentrate, peroxide and a K/Cu/Ti catalyst.

16 Ammonia is fixed by acid excess in the form of sulphate ammonium. In alkaline  
17 solution, this salt releases ammonia, which is collected by drive with the vapour in some  
18 boric acid. The nitrogen concentration is determined by titrating with hydrochloric acid.

19 The percentage of proteins is obtained by multiplying by a factor predetermined  
20 according to the nature of the product to analyze. In fish, this factor is 6.25 (the Quebec  
21 Department of Agriculture, Fisheries and Food, MAPAQ). This value was used for the  
22 liver.

## 1 **Chemicals**

2 All chromatography grade solvents used for chemical analyses were provided by  
3 EM Science (Gibbstown, NJ, USA). Anhydrous sodium sulphate (BDH, Toronto, ON,  
4 Canada), alumina oxide (Bio-Rad Laboratories, Hercules, CA, USA), silica gel (EM  
5 Science) were extracted three times with dichloromethane (DCM) followed by n-hexane  
6 prior to their use. Bio-Beads SX-3 for the gel permeation chromatography (GPC) was  
7 obtained from Bio-Rad laboratories. Standard solutions were supplied by AccuStandards  
8 Inc. (New Haven, CT, USA) or Wellington Laboratories (Guelph, ON, Canada) while  
9 <sup>13</sup>C labelled compounds were obtained from Cambridge Isotope Laboratories (Andover,  
10 MA, USA) or Wellington Laboratories.

## 11 **Organohalogen residue analyses**

12 PBDEs and PCBs were determined in liver samples according to analytical  
13 methods described previously for marine mammal blubber with slight modifications [10,  
14 11]. Briefly, homogenized liver (12g wet weight) were chemically dried with anhydrous  
15 sodium sulphate before being transferred into a glass column. Lipids and lipophilic  
16 compounds were extracted from the sample and 40% was used for chemical analysis.  
17 Labelled surrogates of five PBDEs and eight PCBs were added in all extracts. Lipids  
18 were removed from the extract by Gel Permeation Chromatography (GPC). The cleaning-  
19 up of each extract was performed by elution through a two-layer column packed with  
20 silica, hydrated alumina and anhydrous sodium sulphate. Final extracts were reduced in  
21 volume and spiked with an instrument performance solution containing two additional  
22 labelled <sup>13</sup>C<sub>12</sub> PCBs (PCB-111 and -189) for a final volume of 100µL.

1 Each extract was injected in gas chromatography coupled to an ion trap mass  
2 detector operated in MS-MS mode (GC/MS/MS). The injection of each sample was  
3 performed in a separate run for PBDEs and PCBs. The quantification was then achieved  
4 by comparing retention times and integrated area in the sample chromatogram to  
5 chromatograms of standard PBDEs and PCBs solutions analysed on the GC/MS/MS.  
6 Concentrations were calculated using relative response factor (RRF). The final  
7 concentration of the extracted compounds was corrected for the recovery of the labelled  
8 surrogates added during analysis, which characterize the losses of the target compounds  
9 during the extraction and purification process.

10 Forty individual PBDEs and 45 individual PCBs for which authentic standards  
11 were available were measured in all liver samples. The following PBDE congeners were  
12 analysed: mono (-1, -2, -3), di-tri (-7, -8, -10, -11, -12, -13, -15, -17, -25, -28, -30, -32,  
13 -33, -35, -37), tetra (-47, -49, -66, -71, -75, -77), penta (-85, -99, -100, -116, -118, -119,  
14 -126), hexa (-138, -140, -153, -154, -155, -166) and hepta (-181, -183, -190) bromo-  
15 substituted PBDE congeners. Only seven PBDE congeners were systematically detected  
16 in all samples. PBDE concentrations were reported as  $\sum_7$ PBDEs and as tetra (-47, -49),  
17 penta (-99, -100) and hexa (-153, -154 and -155) PBDE homolog groups.

18 Analysed PCB congeners were di-tri (-8, -15, -18, -28, -31, -33, -37), tetra (-40, -  
19 44, -49, -52, -66+70, -74, -77), penta (-87, -95, -99, -101, -105, -110, -118, -123, -126),  
20 hexa (-128, -138, -149, -151, -153, -156, -169), hepta (-170, -171, -177, -180, -183, -187, -  
21 191), octa (-194, -195, -199, -205), nona (-206, -208) and deca (-209) chloro-substituted  
22 PCB congeners. In all samples, 32 PCB congeners were systematically detected. PCB



1 concentrations were also reported as  $\sum_{32}$  PCBs and as homolog groups which combine  
2 the following congeners for tetra (-44, -49, -52, -66+70 and -74), penta (-87, -95, -99, -  
3 101, -105, -110 and -118), hexa (-128, -138, -149, -151, -153 and -156), hepta (-170, -  
4 171, -177, -180, -183, -187 and -191) and octa-deca (-194, -195, -199, -205, -206, -208  
5 and -209).

6

7

8

9

10

11

12

13

14

15

16

17

18

19

20

21

22

1 **Patterns, concentrations and time trends of PBDEs and PCBs in SLE beluga liver**

2

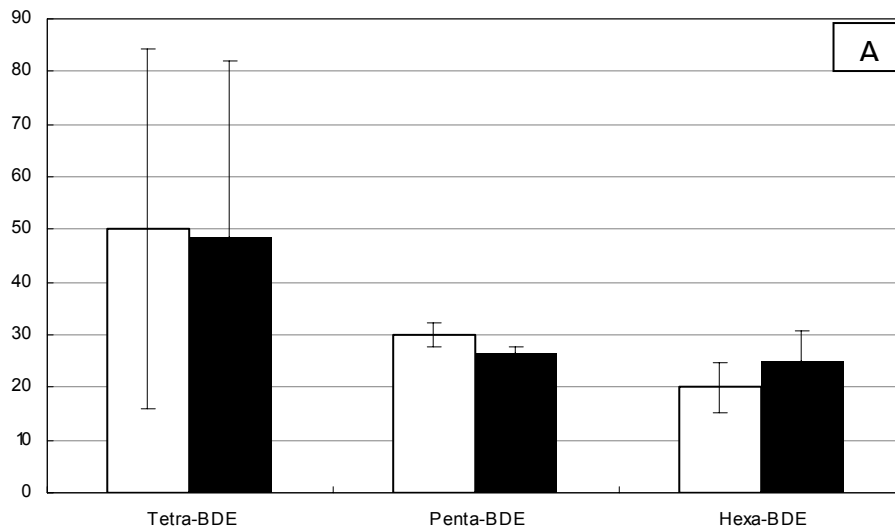

3

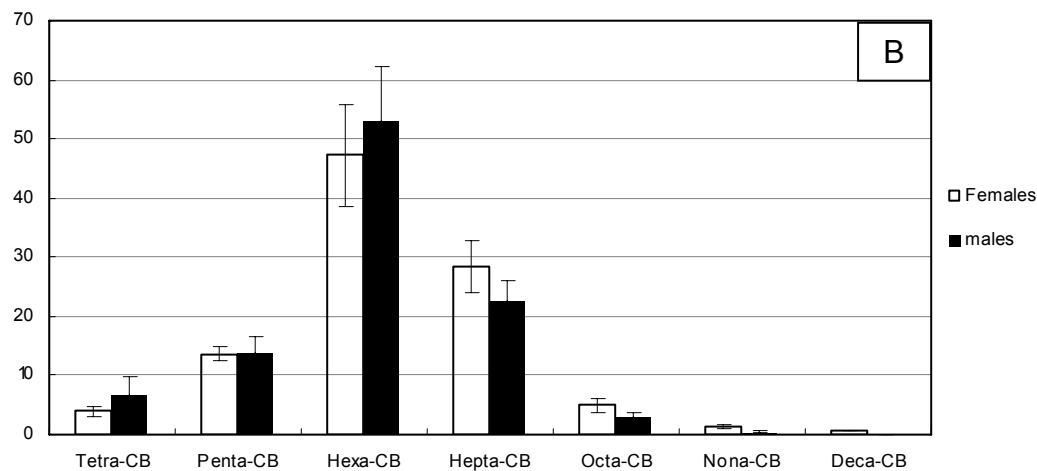

4

5 **Fig. 1** Relative contributions (%; mean±SD) of homolog groups to the  $\Sigma_7$ PBDE (A) and  
6  $\Sigma_{32}$ PCBs (B)

7

8

9

10

1   **REFERENCES**

- 2   1) DFO, 2007. *DFO Canadian Science Advisory Secrandariat*, Proceeding Series  
3       2007/005.
- 4   2) L. Measures, *Le Naturaliste Canadien*, 2008, 132, 75.
- 5   3) D. Martineau, P. Béland, C. Desjardins, and A. Lagacé, *Arch. Environ. Contam.*  
6       *Toxicol.*, 1987, 16, 137.
- 7   4) P. Béland, S. DeGuise, C. Girard, A. Lagace, D. Martineau, R. Michaud, D. C. G.  
8       Muir, R. J. Norstrom,; É. Pelletier, E. Ray and L. R. Shugart, *Journal of Great Lakes*  
9       *Research*, 1993, 19, 766.
- 10  5) D. C. G. Muir, K. Koczanski, B. Rosenberg, and P. Béland, *Environ. Pollut.*, 1996b,  
11       93, 235.
- 12  6) J. M. Gauthier, É. Pelletier, C. Brochu, S. Moore, C. D. Metcalfe, and P. Béland, *Mar.*  
13       *Pollut. Bull.*, 1998, 36, 102.
- 14  7) J. R. Geraci, and V. J. Lounsbury, ed. Baltimore, MD, National Aquarium in  
15       Baltimore, 2nd edn., 2005, 372 p.
- 16  8) R. E. A. Stewart, S. E. Campana, C. M. Jones, and B. E. Stewart, *Canadian Journal*  
17       *of Zoology*, 2006, 84, 1840.
- 18  9) R. B. Bradstreet, New York: Academic Press, 1965, 239 p.
- 19  10) M. Lebeuf, B. Gouteux, L. Measures, and S. Trottier, *Environ. Sci. Technol.*, 2004,  
20       38, 2971.
- 21  11) M. Lebeuf, M. Noël, S. Trottier, and L. Measures, *Sci. Total Environ.*, 2007, 383,  
22       216.

23

24

25

26

27

28
